# Supplementary material for: Repetitive Intermittent Hyperglycemia Drives the M1 Polarization and Inflammatory Responses in THP-1 Macrophages Through the Mechanism Involving the TLR4-IRF5 Pathway
Source: PubMed Central journal article supplement (PMC7463685; doi:10.3390/cells9081892), 2020-08-12
Supplement: cells-09-01892-s001.pdf [file cells-09-01892-s001.pdf]

**Table 1.** Demographic and study population characteristics.

| Physical characteristics of subjects | Nondiabetic group (N = 48) | Diabetic group (N = 39) | <i>p-Value</i> |
|--------------------------------------|----------------------------|-------------------------|----------------|
| Age (years)                          | 44.8 ± 12.1                | 49.5 ± 9.6              | 0.380          |
| Weight (KG)                          | 80.1 ± 11.1                | 83.4 ± 11.6             | 0.063          |
| Height (CM)                          | 1.64 ± 0.1                 | 1.65 ± 0.08             | 0.539          |
| BMI (KG/M2)                          | 28.0 ± 6.1                 | 30.2 ± 4.3              | 0.065          |
| Waist to Hip circumference           | 0.89 ± 15.5                | 0.91 ± 8.2              | 0.323          |
| Body fat percentage (%)              | 32.2 ± 8.5                 | 35,2 ± 6.6              | 0.133          |

All values are means ± standard deviations unless labeled otherwise.

**Table 2.** Clinical characteristics of the study population.

| Fasting concentration of serum sample | Nondiabetic group (N = 48) | Diabetic group (N = 39) | <i>p-Value</i>    |
|---------------------------------------|----------------------------|-------------------------|-------------------|
| Fasting glucose (mmol/l)              | 4.7 ± 0.3                  | 6.6 ± 1.3               | <b>&lt;0.0001</b> |
| Triglycerides (mmol/l)                | 0.91 ± 0.7                 | 1.6 ± 1.0               | <b>&lt;0.0001</b> |
| Total cholesterol (mmol/l)            | 4.7 ± 0.8                  | 5.11 ± 1.5              | 0.124             |
| HDL cholesterol (mmol/l)              | 1.33 ± 0.3                 | 1.25 ± 0.6              | 0.489             |
| Insulin Con. (mu/l)                   | 9.8 ± 8.3                  | 25.3 ± 10.8             | <b>0.0006</b>     |
| HOMA-IR                               | 2.8 ± 1.9                  | 6.7 ± 4.3               | <b>0.042</b>      |

All values are means ± standard deviations unless labeled otherwise.
